# Supplementary material
Source: ML conference proceedings conference paper supplement (https://openreview.net/forum?id=vOHtBbBdun)
Supplement: supplementary_material [file attachment]

# Volumetric Plane-based Rendering: A Novel Approach for Internal View Synthesis in 3D Gaussian Splatting

## Supplementary Material

### A. Point Cloud Initialization

We observe that initializing 10 million Gaussians within the normalized coordinate range  $[-1, 1]$  makes training unstable because it causes overly aggressive densification. With the same number of Gaussians distributed within a compact spatial range, the initial representation becomes excessively dense, and even modest updates to Gaussian positions produce large image-space errors. As a result, the position gradients frequently exceed the fixed densification threshold used in 3DGS, repeatedly triggering densification and exhausts GPU memory. Expanding the initialization range to  $[-3, 3]$  spreads the Gaussians over a larger volume, reduces the effective initial density and stabilizes the gradient scale seen by the adaptive density control. Consequently, 10 million Gaussians are initialized randomly within this range.

### B. Plane Rotation Evaluation

Table A summarizes novel-view synthesis under plane rotation, where the baseline denotes Mip-Splatting trained without GS-IR. To evaluate interpolation between adjacent training orientations, we generate novel test planes by rotating a training slicing plane to unseen intermediate orientations, with offsets ranging from  $\theta$  to  $5\theta$ . On KiTS23 (CT), GS-IR consistently outperforms the baseline over rotation offsets from 10% to 40%, achieving higher PSNR and SSIM together with lower LPIPS and MSE. At a 10% rotation offset, GS-IR improves PSNR from 24.97 dB to 27.74 dB (+2.77 dB) and reduces LPIPS from 0.2045 to 0.1167. On IXI (MRI), GS-IR achieves higher PSNR than the baseline from 20% to 50%, with the largest gain at 50% (+0.99 dB), indicating stronger interpolation between adjacent training orientations. These results show that GS-IR yields more robust novel-view synthesis via plane rotation across both CT and MRI.

Table A. Novel-view synthesis via plane rotation. Each column corresponds to a rotation offset from  $\theta$  to  $5\theta$ , i.e., 10% to 50% of the angular spacing between adjacent training planes defined in Fig. 6. The baseline denotes Mip-Splatting.

| Model               | Dataset | Metric                               | 10%           | 20%           | 30%           | 40%           | 50%           |
|---------------------|---------|--------------------------------------|---------------|---------------|---------------|---------------|---------------|
| <b>MS-IR (Ours)</b> | CT      | PSNR $\uparrow$                      | <b>27.74</b>  | <b>25.30</b>  | <b>24.03</b>  | <b>23.29</b>  | 21.59         |
|                     |         | SSIM $\uparrow$                      | <b>0.8776</b> | <b>0.8348</b> | <b>0.8094</b> | <b>0.7931</b> | 0.7737        |
|                     |         | LPIPS $\downarrow$                   | <b>0.1167</b> | <b>0.1490</b> | <b>0.1705</b> | <b>0.1841</b> | 0.2535        |
|                     |         | MSE( $\times 10^{-3}$ ) $\downarrow$ | <b>1.865</b>  | <b>3.275</b>  | <b>4.391</b>  | <b>5.193</b>  | 8.502         |
|                     | MRI     | PSNR $\uparrow$                      | 23.15         | <b>21.80</b>  | <b>20.77</b>  | <b>20.07</b>  | <b>20.47</b>  |
|                     |         | SSIM $\uparrow$                      | <b>0.8286</b> | <b>0.7910</b> | 0.7647        | 0.7460        | <b>0.7549</b> |
|                     |         | LPIPS $\downarrow$                   | 0.1005        | 0.1134        | 0.1238        | 0.1320        | <b>0.1279</b> |
|                     |         | MSE( $\times 10^{-3}$ ) $\downarrow$ | 6.018         | <b>6.938</b>  | <b>7.835</b>  | <b>8.554</b>  | <b>7.286</b>  |
| <b>Baseline</b>     | CT      | PSNR $\uparrow$                      | 24.97         | 23.77         | 22.88         | 22.18         | <b>21.64</b>  |
|                     |         | SSIM $\uparrow$                      | 0.8408        | 0.8173        | 0.7993        | 0.7853        | <b>0.7744</b> |
|                     |         | LPIPS $\downarrow$                   | 0.2045        | 0.2180        | 0.2310        | 0.2423        | <b>0.2514</b> |
|                     |         | MSE( $\times 10^{-3}$ ) $\downarrow$ | 3.351         | 4.627         | 5.927         | 7.201         | <b>8.432</b>  |
|                     | MRI     | PSNR $\uparrow$                      | <b>23.25</b>  | 21.08         | 20.55         | 19.91         | 19.48         |
|                     |         | SSIM $\uparrow$                      | 0.8174        | 0.7846        | <b>0.7680</b> | <b>0.7532</b> | 0.7149        |
|                     |         | LPIPS $\downarrow$                   | <b>0.0993</b> | <b>0.1109</b> | <b>0.1165</b> | <b>0.1232</b> | <b>0.1279</b> |
|                     |         | MSE( $\times 10^{-3}$ ) $\downarrow$ | <b>5.881</b>  | 7.196         | 8.241         | 8.876         | 9.150         |
